# Supplementary material for: Metabolic network driven analysis of genome-wide transcription data from Aspergillus nidulans
Source: Springer Nature journal article supplement (doi:10.1186/gb-2006-7-11-r108), 2006-11-15

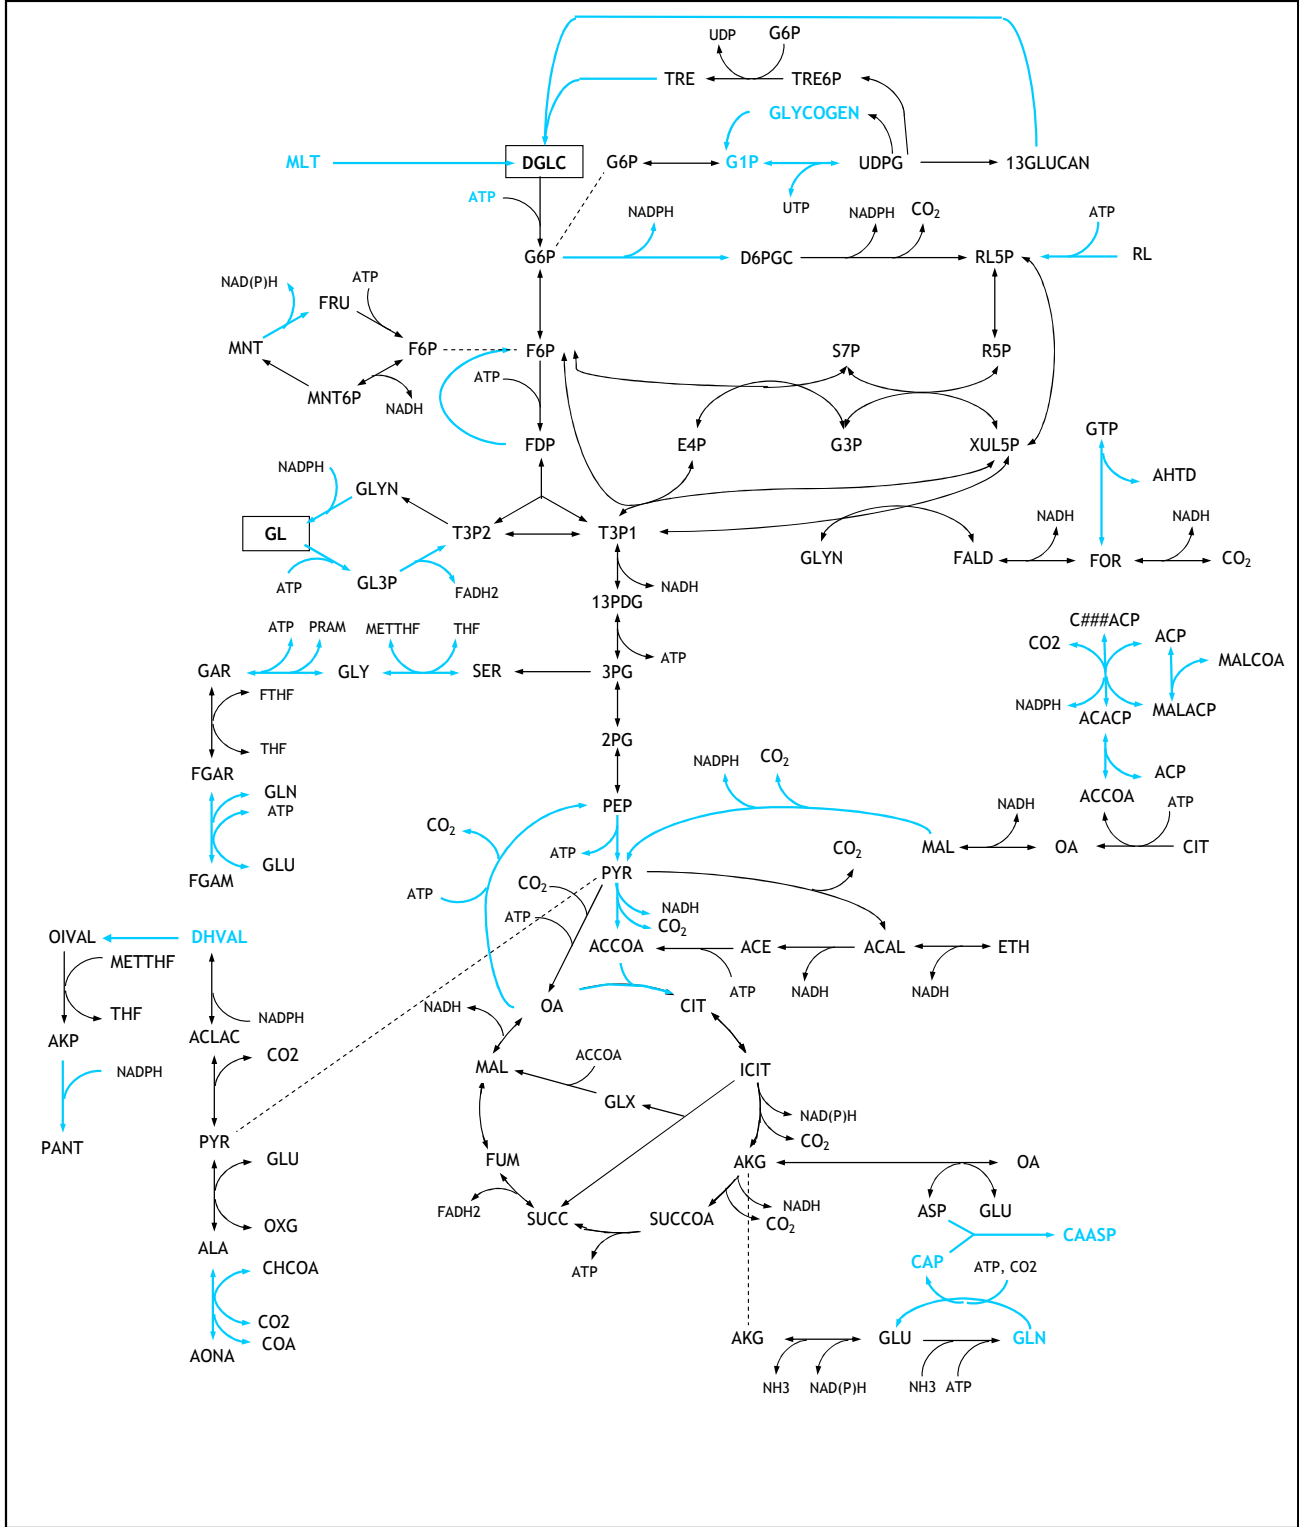

Supplement: Additional file 6 [file gb-2006-7-11-r108-s6.pdf]
