# Supplementary material for: Metabolic network driven analysis of genome-wide transcription data from Aspergillus nidulans
Source: Springer Nature journal article supplement (doi:10.1186/gb-2006-7-11-r108), 2006-11-15
Supplement: Additional file 10 [file gb-2006-7-11-r108-s10.pdf]

**Table S9** – Classification of the up-regulated genes represented in Table II into GO categories (provided by CADRE), according to the three most important biological processes and molecular functions.

|                            | <b>Biological processes</b>                                                                                                                                                                    | <b>Molecular functions</b>                                                                                                                                                                                                                                               |
|----------------------------|------------------------------------------------------------------------------------------------------------------------------------------------------------------------------------------------|--------------------------------------------------------------------------------------------------------------------------------------------------------------------------------------------------------------------------------------------------------------------------|
| <b>Ethanol vs Glucose</b>  | <ul style="list-style-type: none"> <li>• Generation of precursor metabolites and energy</li> <li>• Main pathways of carbohydrate metabolism</li> <li>• Acetyl-CoA metabolism</li> </ul>        | <ul style="list-style-type: none"> <li>• Oxidoreductase activity</li> <li>• Oxidoreductase activity, acting on the aldehyde or oxo group of donors</li> <li>• Oxidoreductase activity, acting on the aldehyde or oxo group of donors, NAD or NADP as acceptor</li> </ul> |
| <b>Ethanol vs Glycerol</b> | <ul style="list-style-type: none"> <li>• Main pathways of carbohydrate metabolism</li> <li>• Energy derivation by oxidation of organic compounds</li> <li>• Organic acid metabolism</li> </ul> | <ul style="list-style-type: none"> <li>• Oxidoreductase activity</li> <li>• Transaminase activity</li> <li>• Transferase activity, transferring nitrogenous groups</li> </ul>                                                                                            |
| <b>Glycerol vs Glucose</b> | <ul style="list-style-type: none"> <li>• Cell wall</li> <li>• Cell wall (sensu Fungi)</li> <li>• External encapsulating structure</li> </ul>                                                   | <ul style="list-style-type: none"> <li>• Glucan 1,3-beta-glucosidase activity</li> <li>• Beta-glucosidase activity</li> <li>• Hydrolase activity, hydrolyzing O-glycosyl compounds</li> </ul>                                                                            |

**Table S10** – Classification of the down-regulated genes represented in Table II into GO categories (provided by CADRE), according to the three most important biological processes and molecular functions.

|                                | <b>Biological processes</b>                                                                                                                                                               | <b>Molecular functions</b>                                                                                                                                                               |
|--------------------------------|-------------------------------------------------------------------------------------------------------------------------------------------------------------------------------------------|------------------------------------------------------------------------------------------------------------------------------------------------------------------------------------------|
| <b>Ethanol vs<br/>Glucose</b>  | <ul style="list-style-type: none"> <li>• Monosaccharide metabolism</li> <li>• Hexose metabolism</li> <li>• Alcohol metabolism</li> </ul>                                                  | <ul style="list-style-type: none"> <li>• Carbohydrate kinase activity</li> <li>• Intramolecular oxidoreductase activity</li> <li>• Isomerase activity</li> </ul>                         |
| <b>Ethanol vs<br/>Glycerol</b> | <ul style="list-style-type: none"> <li>• Glucose metabolism</li> <li>• Hexose metabolism</li> <li>• Carbohydrate metabolism</li> </ul>                                                    | <ul style="list-style-type: none"> <li>• Intramolecular oxidoreductase activity</li> <li>• Hydrolase activity, hydrolyzing O-glycosyl compounds</li> <li>• Isomerase activity</li> </ul> |
| <b>Glycerol vs<br/>Glucose</b> | <ul style="list-style-type: none"> <li>• Cell wall biosynthesis (sensu Fungi)</li> <li>• Cell wall organization and biogenesis (sensu Fungi)</li> <li>• Cell wall biosynthesis</li> </ul> | <ul style="list-style-type: none"> <li>• Heat shock protein activity</li> <li>• Alpha-glucosidase activity</li> <li>• Glucosidase activity</li> </ul>                                    |
