# Supplementary material for: Metabolic network driven analysis of genome-wide transcription data from Aspergillus nidulans
Source: PubMed Central journal article supplement (PMC1794588; doi:10.1186/gb-2006-7-11-r108), 2006-11-15

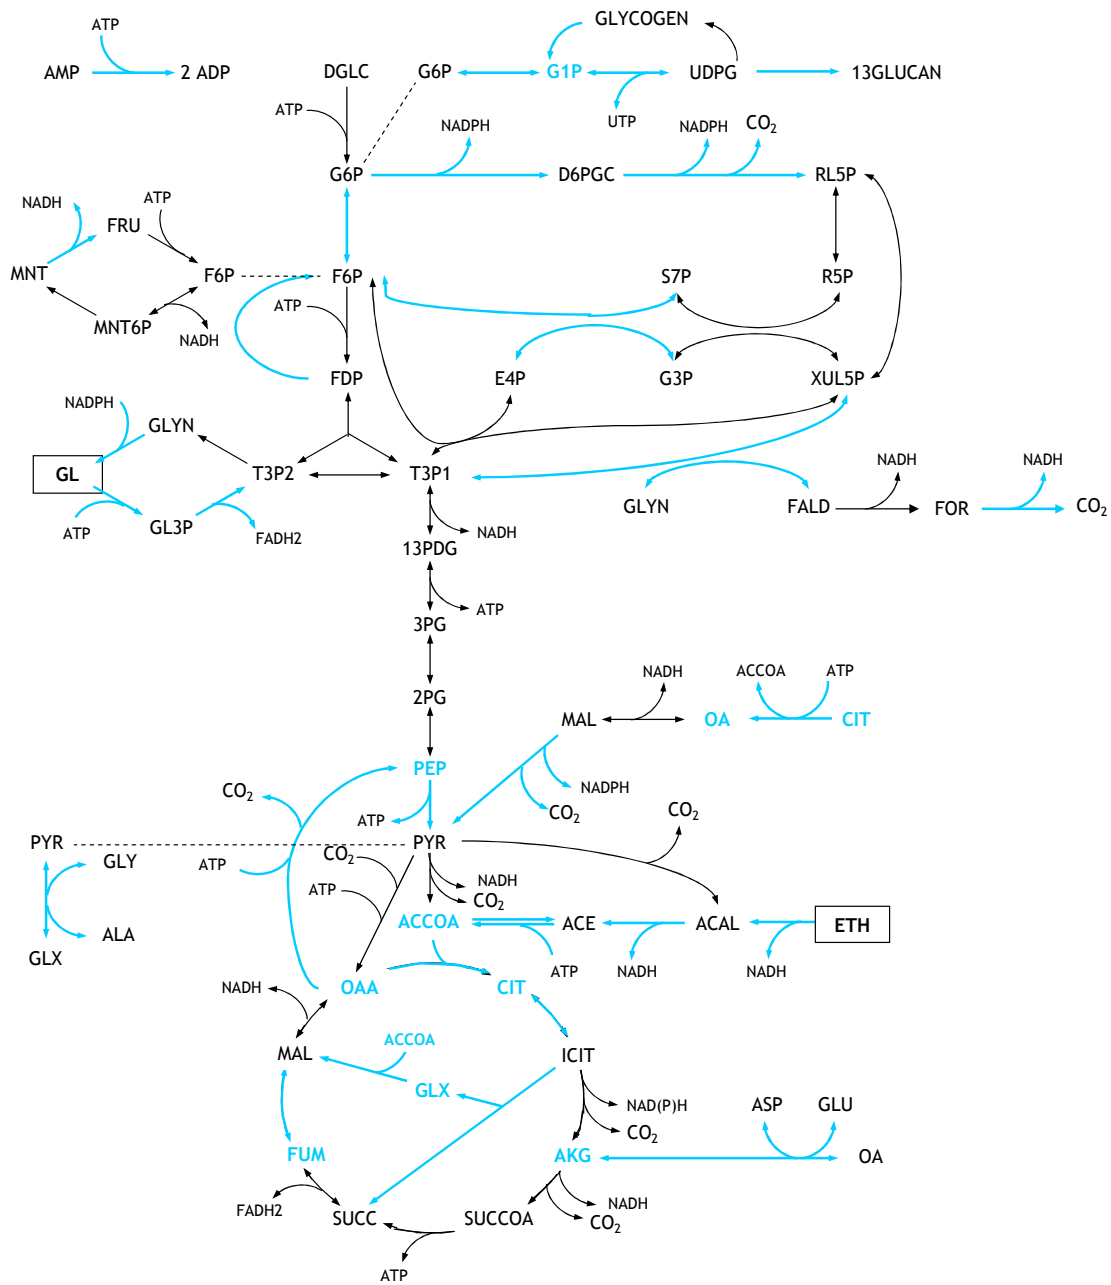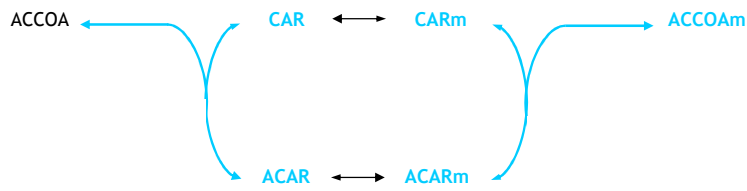

Supplement: gb-2006-7-11-r108-S5.pdf [file gb-2006-7-11-r108-S5.pdf]
