# Supplementary material for: Metabolic network driven analysis of genome-wide transcription data from Aspergillus nidulans
Source: PubMed Central journal article supplement (PMC1794588; doi:10.1186/gb-2006-7-11-r108), 2006-11-15
Supplement: gb-2006-7-11-r108-S14.pdf [file gb-2006-7-11-r108-S14.pdf]

**Table S17** – Classification of the genes included in the “small” highly correlated subnetworks into GO categories (provided by CADRE), according to the three most important biological processes and molecular functions.

| <b>Subnetwork</b>          | <b>No. of genes</b> | <b>Biological processes</b>                                                                                                                                                                             | <b>Molecular functions</b>                                                                                                                                                                                     |
|----------------------------|---------------------|---------------------------------------------------------------------------------------------------------------------------------------------------------------------------------------------------------|----------------------------------------------------------------------------------------------------------------------------------------------------------------------------------------------------------------|
| <b>Ethanol vs Glucose</b>  | 26                  | <ul style="list-style-type: none"> <li>• Main pathways of carbohydrate metabolism</li> <li>• Energy derivation by oxidation of organic compounds</li> <li>• Cellular carbohydrate metabolism</li> </ul> | <ul style="list-style-type: none"> <li>• Catalytic activity</li> <li>• Alpha-glucosidase activity</li> <li>• Carnitine O-acetyltransferase activity</li> </ul>                                                 |
| <b>Ethanol vs Glycerol</b> | 33                  | <ul style="list-style-type: none"> <li>• Carbohydrate metabolism</li> <li>• Cellular carbohydrate metabolism</li> <li>• Main pathways of carbohydrate metabolism</li> </ul>                             | <ul style="list-style-type: none"> <li>• Catalytic activity</li> <li>• Transferase activity</li> <li>• Transferase activity, transferring acyl groups, acyl groups converted into alkyl on transfer</li> </ul> |
| <b>Glycerol vs Glucose</b> | 34                  | <ul style="list-style-type: none"> <li>• Pyruvate metabolism</li> <li>• Organic acid metabolism</li> <li>• Carboxylic acid metabolism</li> </ul>                                                        | <ul style="list-style-type: none"> <li>• Catalytic activity</li> <li>• Carbon-nitrogen ligase activity, with glutamine as amido-N-donor</li> <li>• Carbamoyl-phosphate synthase activity</li> </ul>            |
